# Supplementary material for: Plasma microRNAs as a Potential Biomarker for Identification of Progressive Supranuclear Palsy
Source: MDPI journal article supplement (doi:10.3390/diagnostics12051204), 2022-05-11
Supplement: s1 [file s1]

**Article title: Plasma microRNAs as a potential biomarker for identification of progressive supranuclear palsy**

**Journal Name: Diagnostics, MDPI.**

Palaniswamy Ramaswamy<sup>1, #a</sup>, Rita Christopher<sup>2</sup>, Pramod Kumar Pal<sup>1</sup>, Monojit Debnath<sup>3</sup>, Ravi Yadav<sup>1\*</sup>

<sup>1</sup>Department of Neurology, National Institute of Mental Health and Neuro Sciences (NIMHANS), Bengaluru, Karnataka, India

<sup>2</sup>Department of Neurochemistry, National Institute of Mental Health and Neuro Sciences (NIMHANS), Bengaluru, Karnataka, India

<sup>3</sup>Department of Human Genetics, National Institute of Mental Health and Neuro Sciences (NIMHANS), Bengaluru, Karnataka, India

<sup>#a</sup>Current address: Multi-Disciplinary Research Unit, Armed Forces Medical College, Pune, Maharashtra, India

**\*Corresponding author:**

E-mail: docravi20@yahoo.com

**Table S1a** Clinical characteristics of patients with PSP and healthy controls for initial miRNA screening

| Variable                         | Control (n=9) | Case (n=12) | P-value |
|----------------------------------|---------------|-------------|---------|
| Age, year (mean±SE)              | 60.9±1.7      | 61.6±1.6    | 0.77    |
| Gender, male/female              | 6/3           | 8/4         | 0.61    |
| Disease duration, year (mean±SE) | -             | 2.4±0.37    |         |
| PSPRS (mean±SD)                  | -             | 40.8±1.06   |         |
| Hypertension (%)                 | 0/9           | 0/12        |         |
| Diabetes (%)                     | 0/9           | 0/12        |         |
| Smoking (%)                      | 0/9           | 0/12        |         |
| Alcohol (%)                      | 0/9           | 0/12        |         |

**Table S1b** Demographic and clinical variables of patients with PSP and control subjects for validation

| <b>Variable</b>                         | <b>Controls (n=17)</b> | <b>Cases (n=18)</b> | <b>P-value</b> |
|-----------------------------------------|------------------------|---------------------|----------------|
| <b>Age, year (mean±SE)</b>              | 57.8±1.4               | 60.11±1.6           | 0.29           |
| <b>Gender, male/female</b>              | 10/7                   | 14/4                | 0.12           |
| <b>Disease duration, year (mean±SE)</b> | -                      | 2.37±1.17           |                |
| <b>Hypertension (%)</b>                 | 4/17                   | 3/18                |                |
| <b>Diabetes (%)</b>                     | 2/17                   | 3/18                |                |
| <b>Smoking (%)</b>                      | 1/17                   | 1/18                |                |
| <b>Alcohol (%)</b>                      | 0/17                   | 1/18                |                |

N=number; S.E= standard error; SD=standard deviation; PSP= progressive supranuclear palsy; PSPRS= PSP rating scale.

**Table S2** Plasma qPCR miRNAs profiling results with >1.5 or <1.5 fold change

| miRNAs          | Average<br>Delta cq Case | Average<br>Delta cq Control | Delta delta cq<br>(case– control) | Fold change |
|-----------------|--------------------------|-----------------------------|-----------------------------------|-------------|
| hsa-miR-33a-5p  | -1.49                    | -0.46                       | -1.03                             | 2.04        |
| hsa-miR-99a-5p  | 1.48                     | 2.52                        | -1.04                             | 2.06        |
| hsa-miR-19b-3p  | -4.50                    | -3.48                       | -1.02                             | 2.03        |
| hsa-miR-154-5p  | 2.46                     | 3.18                        | -0.72                             | 1.66        |
| hsa-miR-92b-3p  | 4.01                     | 5.22                        | -1.21                             | 2.32        |
| hsa-miR-32-5p   | 2.00                     | 3.19                        | -1.19                             | 2.28        |
| hsa-miR-133a-3p | 2.00                     | 2.72                        | -0.72                             | 1.65        |
| hsa-miR-130a-3p | -3.50                    | -2.78                       | -0.72                             | 1.65        |
| hsa-miR-29b-3p  | 0.02                     | 1.23                        | -1.21                             | 2.31        |
| hsa-miR-136-5p  | 1.50                     | 2.20                        | -0.7                              | 1.63        |
| hsa-miR-142-5p  | -2.51                    | -1.79                       | -0.72                             | 1.65        |
| hsa-miR-100-5p  | 4.51                     | 5.15                        | -0.64                             | 1.56        |
| hsa-miR-326     | 0.00                     | 0.72                        | -0.72                             | 1.64        |
| hsa-miR-193a-5p | 4.48                     | 5.13                        | -0.65                             | 1.56        |
| hsa-miR-127-3p  | 1.98                     | 2.69                        | -0.71                             | 1.64        |
| hsa-miR-130b-3p | 0.08                     | 1.79                        | -1.71                             | 3.29        |
| hsa-miR-423-3p  | -2.53                    | -1.81                       | -0.72                             | 1.65        |
| hsa-miR-210-3p  | 3.11                     | 5.66                        | -2.55                             | 5.85        |
| hsa-miR-374a-5p | -0.50                    | 0.21                        | -0.71                             | 1.64        |
| hsa-miR-877-5p  | 2.99                     | 4.18                        | -1.19                             | 2.28        |
| hsa-miR-136-3p  | 2.51                     | 3.73                        | -1.22                             | 2.34        |
| hsa-miR-29c-3p  | -2.49                    | -1.78                       | -0.71                             | 1.64        |
| hsa-miR-543     | 3.72                     | 2.51                        | 1.21                              | 2.31        |
| hsa-miR-106a-5p | -2.50                    | -3.48                       | 0.98                              | -1.96       |
| hsa-miR-145-5p  | -0.51                    | -1.47                       | 0.96                              | -1.96       |
| hsa-miR-424-5p  | -0.49                    | -1.46                       | 0.97                              | -1.96       |
| hsa-miR-18b-5p  | 0.15                     | -1.32                       | 1.47                              | -2.78       |
| hsa-miR-223-5p  | 3.50                     | 2.71                        | 0.79                              | -1.73       |
| has-miR-16-5p   | -6.52                    | -6.48                       | -0.04                             | 1.03        |

**Table S3** Locked Nucleic Acid (LNA) microRNAs primers

| miRNA            | Mature miRNA sequence          | Qiagen product number |
|------------------|--------------------------------|-----------------------|
| hsa-miR-23a-3p   | 5'AUCACAUUGCCAGGGAUUUCC        | YP00204772            |
| hsa-miR-451a     | 5'AAACCGUUACCAUACUGAGUU        | YP02119305            |
| hsa- miR-19b-3p  | 5'UGUGCAAAUCCAUGCAAAACUGA      | YP00204450            |
| hsa-miR-33a-5p   | 5'GUGCAUUGUAGUUGCAUUGCA        | YP00205690            |
| hsa-miR-130b-3p  | 5'CAGUGCAAUGAUGAAAGGGCAU       | YP00204317            |
| hsa-miR-136-3p   | 5'CAUCAUCGUCUCAAUGAGUCU        | YP00205503            |
| hsa-miR-210-3p   | 5'CUGUGCGUGUGACAGCGGCUGA       | YP00204333            |
| hsa-miR-16-5p    | 5'UAGCAGCACGUAAAUAUUGGCG       | YP00205702            |
| RNA spike-in kit | UniSp2, UniSp6 & cel-miR-39-3p | 339390                |

**Table S4:** Multiple KEGG pathways regulated by candidate microRNAs.

| SNo. | KEGG pathway                                             | p-value  | #genes | #miRNAs |
|------|----------------------------------------------------------|----------|--------|---------|
| 1    | Fatty acid biosynthesis                                  | 1.89E-19 | 1      | 1       |
| 2    | Endocytosis                                              | 7.82E-16 | 51     | 4       |
| 3    | Hippo signaling pathway                                  | 3.60E-14 | 44     | 4       |
| 4    | FoxO signaling pathway                                   | 6.76E-14 | 42     | 4       |
| 5    | Protein processing in endoplasmic reticulum              | 9.87E-12 | 40     | 4       |
| 6    | Estrogen signaling pathway                               | 2.47E-11 | 24     | 4       |
| 7    | Viral carcinogenesis                                     | 2.97E-11 | 29     | 3       |
| 8    | p53 signaling pathway                                    | 4.23E-11 | 25     | 3       |
| 9    | TGF-beta signaling pathway                               | 9.09E-11 | 24     | 4       |
| 10   | Proteoglycans in cancer                                  | 9.04E-09 | 35     | 4       |
| 11   | Adrenergic signaling in cardiomyocytes                   | 1.13E-08 | 26     | 4       |
| 12   | Signaling pathways regulating pluripotency of stem cells | 1.30E-08 | 26     | 3       |
| 13   | AMPK signaling pathway                                   | 2.42E-08 | 34     | 3       |
| 14   | Glioma                                                   | 1.32E-07 | 17     | 3       |
| 15   | Prostate cancer                                          | 1.92E-07 | 25     | 3       |
| 16   | Chronic myeloid leukemia                                 | 2.30E-07 | 21     | 4       |
| 17   | Colorectal cancer                                        | 5.94E-07 | 17     | 4       |
| 18   | Hepatitis B                                              | 8.80E-07 | 29     | 4       |
| 19   | Sphingolipid signaling pathway                           | 9.84E-06 | 23     | 3       |
| 20   | Endometrial cancer                                       | 1.44E-05 | 16     | 3       |
| 21   | Pancreatic cancer                                        | 2.34E-05 | 17     | 4       |
| 22   | Melanoma                                                 | 2.47E-05 | 16     | 3       |
| 23   | Pathways in cancer                                       | 7.34E-05 | 50     | 4       |

|    |                                           |          |    |   |
|----|-------------------------------------------|----------|----|---|
| 24 | Cocaine addiction                         | 7.81E-05 | 8  | 2 |
| 25 | Non-small cell lung cancer                | 7.81E-05 | 14 | 3 |
| 26 | PI3K-Akt signaling pathway                | 0.000225 | 46 | 3 |
| 27 | Progesterone-mediated oocyte maturation   | 0.000246 | 20 | 3 |
| 28 | Thyroid cancer                            | 0.000302 | 7  | 3 |
| 29 | Long-term depression                      | 0.000406 | 12 | 3 |
| 30 | Prolactin signaling pathway               | 0.000406 | 15 | 3 |
| 31 | Acute myeloid leukemia                    | 0.000867 | 14 | 3 |
| 32 | Oocyte meiosis                            | 0.001016 | 22 | 4 |
| 33 | Chagas disease (American trypanosomiasis) | 0.002782 | 20 | 4 |
| 34 | Central carbon metabolism in cancer       | 0.005534 | 13 | 3 |
| 35 | Bladder cancer                            | 0.006369 | 10 | 3 |
| 36 | Insulin signaling pathway                 | 0.006369 | 23 | 4 |
| 37 | Dopaminergic synapse                      | 0.006829 | 23 | 4 |
| 38 | Platelet activation                       | 0.008042 | 19 | 4 |
| 39 | Melanogenesis                             | 0.008474 | 17 | 3 |
| 40 | Fatty acid metabolism                     | 0.008727 | 3  | 3 |
| 41 | Hepatitis C                               | 0.009513 | 22 | 3 |
| 42 | Cholinergic synapse                       | 0.011449 | 16 | 4 |
| 43 | HTLV-I infection                          | 0.012462 | 33 | 4 |
| 44 | Oxytocin signaling pathway                | 0.028471 | 23 | 4 |
| 45 | Toxoplasmosis                             | 0.033598 | 17 | 4 |
| 46 | Gap junction                              | 0.037395 | 13 | 3 |
| 47 | Cell cycle                                | 0.038744 | 22 | 4 |
| 48 | Renal cell carcinoma                      | 0.044706 | 12 | 4 |

**SI Table S5.** Sorted KEGG pathways regulated by candidate microRNAs and associated target genes identified using three databases.

|                                    | FoxO<br>signal<br>ing<br>path<br>way                                                                                                                                                                          | TGF-<br>beta<br>signal<br>ing<br>path<br>way                                          | Signalin<br>g<br>pathwa<br>ys<br>regulati<br>ng<br>pluripot<br>ency of<br>stem<br>cells | p53<br>signal<br>ing<br>path<br>way                                             | ErbB<br>signal<br>ing<br>path<br>way                             | Prola<br>ctin<br>signal<br>ing<br>path<br>way                   | Protein<br>processi<br>ng in<br>endoplas<br>mic<br>reticulu<br>m      | Cell<br>cycle                                                                                      | Insuli<br>n<br>signal<br>ing<br>path<br>way                                                      | PI3K-<br>Akt<br>signal<br>ing<br>path<br>way                                     | Hipp<br>o<br>signal<br>ing<br>path<br>way                         | Wnt<br>signal<br>ing<br>path<br>way |
|------------------------------------|---------------------------------------------------------------------------------------------------------------------------------------------------------------------------------------------------------------|---------------------------------------------------------------------------------------|-----------------------------------------------------------------------------------------|---------------------------------------------------------------------------------|------------------------------------------------------------------|-----------------------------------------------------------------|-----------------------------------------------------------------------|----------------------------------------------------------------------------------------------------|--------------------------------------------------------------------------------------------------|----------------------------------------------------------------------------------|-------------------------------------------------------------------|-------------------------------------|
| hsa<br>-<br>miR<br>-<br>19b<br>-3p | IRS2<br>CCNB<br>1<br>STK4<br>PIK3C<br>B<br>SETD<br>7<br>MAP<br>K14<br>CCND<br>2<br>RAF1<br>CDKN<br>1B<br>SMA<br>D4<br>S1PR<br>1<br>MAP<br>K8<br>PRKA<br>A1<br>CDKN<br>1A<br>PTEN<br>TGFB<br>R2<br>BCL2<br>L11 | INHBA<br>ACVR<br>1<br>SMA<br>D4<br>ZFVY<br>E9<br>SMA<br>D5<br>BAM<br>BI<br>TGFB<br>R2 | GSK3B<br>FZD5<br>PIK3CB<br>MAPK1<br>4<br>RAF1<br>INHBA<br>ACVR1<br>SMAD4<br>SMAD5       | ZMAT3<br>CCNB<br>1<br>CCND<br>2<br>CHEK<br>1<br>CASP<br>3<br>CDKN<br>1A<br>PTEN | GSK3B<br>PIK3CB<br>RAF1<br>CDKN<br>1B<br>MAP<br>K8<br>CDKN<br>1A | GSK3B<br>PIK3CB<br>MAP<br>K14<br>CCND<br>2<br>RAF1<br>MAP<br>K8 | DNAJA1<br>SAR1B<br>UBQLN2<br>SEC24C<br>MAPK8<br>HSP90B<br>1<br>UBE2D3 | GSK3B<br>CCNB<br>1<br>CCN<br>A2<br>CCN<br>D2<br>CDK<br>N1B<br>CHEK<br>1<br>SMA<br>D4<br>CDK<br>N1A | IRS2<br>GSK3B<br>PPP2<br>R5E<br>PIK3CB<br>RAF1<br>CAL<br>M2<br>SREB<br>F1<br>MAP<br>K8<br>PRKAA1 | GSK3B<br>FZD5<br>CCND<br>2<br>SMA<br>D4<br>FRM<br>D6<br>PARD<br>6B<br>TGFB<br>R2 | GSK3B<br>FZD5<br>CCND<br>2<br>SMA<br>D4<br>MAP<br>K8<br>BAM<br>BI |                                     |

|                                         |                                                                                                                                                 |                                                                                                     |                                                            |                                                                        |                                                      |                                              |                                                                         |                                                                                                 |                                                            |                                                                                                        |                                                                       |                                                         |
|-----------------------------------------|-------------------------------------------------------------------------------------------------------------------------------------------------|-----------------------------------------------------------------------------------------------------|------------------------------------------------------------|------------------------------------------------------------------------|------------------------------------------------------|----------------------------------------------|-------------------------------------------------------------------------|-------------------------------------------------------------------------------------------------|------------------------------------------------------------|--------------------------------------------------------------------------------------------------------|-----------------------------------------------------------------------|---------------------------------------------------------|
| hsa<br>-<br>miR<br>-<br>33a<br>-5p      | IRS2<br>CCNB<br>1<br>SETD<br>7<br>MAP<br>K14<br>RAF1<br>CDKN<br>1B<br>MAP<br>K8<br>SOS1<br>BCL2<br>L11                                          | MYC<br>SMA<br>D5<br>SP1                                                                             | FZD5<br>MAPK1<br>4<br>RAF1<br>MYC<br>SMAD5                 | CCNB<br>1<br>CASP<br>3                                                 | RAF1<br>CDKN<br>1B<br>MAP<br>K8<br>MYC<br>SOS1       | MAP<br>K14<br>RAF1<br>MAP<br>K8<br>SOS1      | SAR1B<br>HERPUD<br>1<br>UBQLN2<br>SEC24C<br>MAPK8<br>VCP<br>HSP90B<br>1 | CCNB<br>1<br>CDK<br>N1B<br>MYC                                                                  | IRS2<br>RAF1<br>SREB<br>F1<br>MAP<br>K8<br>SOS1            | PPP2<br>R5E<br>RAF1<br>CDKN<br>1B<br>MYC<br>SOS1<br>HSP9<br>OB1<br>BCL2L<br>11                         | FZD5<br>MYC<br>PARD<br>6B                                             | GSK3<br>B<br>CCND<br>2<br>SMA<br>D4<br>MYC<br>BAM<br>BI |
| hsa<br>-<br>miR<br>-<br>130<br>b-<br>3p | CCNB<br>1<br>STK4<br>PIK3C<br>B<br>CCND<br>2<br>SMA<br>D4<br>S1PR<br>1<br>SOS1<br>PRKA<br>A1<br>CDKN<br>1A<br>PTEN<br>TGFB<br>R2<br>BCL2<br>L11 | INHBA<br>ACVR<br>1<br>SMA<br>D4<br>MYC<br>ZFYV<br>E9<br>SMA<br>D5<br>SP1<br>BAM<br>BI<br>TGFB<br>R2 | GSK3B<br>PIK3CB<br>INHBA<br>ACVR1<br>SMAD4<br>MYC<br>SMAD5 | ZMA<br>T3<br>CCNB<br>1<br>CCND<br>2<br>CHEK<br>1<br>CDKN<br>1A<br>PTEN | GSK3<br>B<br>PIK3C<br>B<br>MYC<br>SOS1<br>CDKN<br>1A | GSK3<br>B<br>PIK3C<br>B<br>CCND<br>2<br>SOS1 | DNAJA1<br>SAR1B<br>HERPUD<br>1<br>CANX<br>VCP<br>UBE2D3                 | GSK3<br>B<br>CCNB<br>1<br>CCN<br>A2<br>CCN<br>D2<br>CHEK<br>1<br>SMA<br>D4<br>MYC<br>CDK<br>N1A | GSK3<br>B<br>PIK3C<br>B<br>CAL<br>M2<br>SOS1<br>PRKA<br>A1 | GSK3<br>B<br>PIK3C<br>B<br>CCND<br>2<br>MYC<br>SOS1<br>PRKA<br>A1<br>CDKN<br>1A<br>PTEN<br>BCL2L<br>11 | GSK3<br>B<br>CCND<br>2<br>SMA<br>D4<br>MYC<br>FRM<br>D6<br>TGFB<br>R2 | FZD5<br>MAP<br>K8<br>MYC                                |
| hsa<br>-<br>miR<br>-<br>136<br>-3p      | TGFB<br>2                                                                                                                                       | TGFB<br>2                                                                                           |                                                            |                                                                        |                                                      |                                              | CANX                                                                    |                                                                                                 | PPP1<br>CB                                                 |                                                                                                        | TGFB<br>2<br>PPP1<br>CB                                               |                                                         |
